# Supplementary material for: Presence and utility of electrocardiographic abnormalities in long-term childhood cancer survivors
Source: HighWire-hosted journal article supplement (doi:10.1136/heartjnl-2023-323474), 2024-03-19
Supplement: heartjnl-2023-323474supp001_data_supplement.pdf [file heartjnl-2023-323474supp001_data_supplement.pdf]

## Supplementary file

|                                                                                                                                                                                       | Page |
|---------------------------------------------------------------------------------------------------------------------------------------------------------------------------------------|------|
| <b>A. Additional information on cancer treatment variables</b>                                                                                                                        |      |
| Protocol – data collection radiotherapy exposure involving the heart region                                                                                                           | 2    |
| Uniform radiotherapy body compartment classification system                                                                                                                           | 3    |
| Definitions of ECG abnormalities according to the Minnesota Code                                                                                                                      | 4    |
| <b>B. Characteristics of the participating and non-participating survivors from the DCCSS LATER 2 CARD study</b>                                                                      | 5    |
| <b>C. Comparison of the prevalence of the separate major, minor and other ECG abnormalities between survivors (all and per cardiotoxic cancer exposure) and siblings</b>              | 6    |
| <b>D. Association between ECG and systolic function – additional results</b>                                                                                                          |      |
| Table 1. Comparison of the prevalence of the separate major and minor ECG abnormalities between survivors with a normal LVEF and an abnormal LVEF                                     | 8    |
| Table 2. Multivariable models predicting the presence of LVEF <52% in males/ <54% in females in the cardiomyopathy surveillance group                                                 | 9    |
| Table 3. Multivariable model including all the ECG variables selected by LASSO predicting the presence of LVEF <52% in males/<54% in females in the cardiomyopathy surveillance group | 9    |
| Table 4. Multivariable models predicting the presence of LVEF <50% in the cardiomyopathy surveillance group                                                                           | 10   |
| Table 5. Multivariable model including all the ECG variables selected by LASSO predicting the presence of LVEF <50% in the cardiomyopathy surveillance group                          | 10   |
| Table 6. Multivariable model including all the ECG variables selected by LASSO predicting the presence of LVEF<45% in the cardiomyopathy surveillance                                 | 11   |
| Table 7. Diagnostic rule derived from model 2                                                                                                                                         | 11   |

## A. Additional information on cancer treatment variables

### **Protocol – data collection radiotherapy exposure involving the heart region**

#### *Radiotherapy exposure characterization*

Based on the available information on the radiotherapy field(s) (location) from the letter of the pediatric radiation oncologist, each treatment was assigned to one or more body compartments, including head, neck, spine, thorax, abdominopelvic, upper- and lower extremities. Total body irradiation (TBI) was considered separately. Validation of radiotherapy data was performed by experts in radiotherapy.

We calculated the total maximum prescribed dose as the maximum dose to the smallest field, consisting of the sum of the full-field dose (primary) and the boost dose.

Furthermore, all our calculations include radiotherapy doses for both the primary tumor and any recurrences. If the same body part was re-irradiated the respective doses were summed to derive the maximum dose to the smallest field. In case the recurrence treatment was given as a non-overlapping field in the same body part (e.g. for primary tumor and recurrences or metastases both in the lungs for example), the dose to the field with the highest dose was assigned as body compartment dose for our study.

For the DCCSS LATER 2 CARD we focused on thorax, spine, abdominopelvic and TBI as they possibly involve the heart region. The specific fields exposing the body compartments spine and abdominopelvic are shown in the table below. In collaboration with MD Anderson Cancer Center, Houston, the United States and Gustave Roussy, Chevilly Larue, France, we estimated the mean dose received by the whole heart after total spine or abdominopelvic radiotherapy by using radiation dose reconstruction methods<sup>1-6</sup>. Based on a subset of 110 survivors, we derived percentages of dose received by the whole heart, by dividing the total prescribed dose and the estimated mean whole heart dose. As a result, we used 55% of the maximum prescribed spine dose and 10% of the maximum prescribed abdominopelvic dose to estimate the dose received by the whole heart. Furthermore, we used 100% of the maximum prescribed thorax dose to estimate the dose received by the whole heart. If more than one of above body compartments were irradiated, the highest dose was assigned as the dose received on the heart region. Finally, we added 100% of the total prescribed TBI dose to estimate the final radiotherapy dose on the heart region.

**Uniform radiotherapy (RT) body compartment classification system**

| <b>RT body compartments</b> | <b>Childhood cancer-specific treatment fields</b>                                                                                                                                                                                |
|-----------------------------|----------------------------------------------------------------------------------------------------------------------------------------------------------------------------------------------------------------------------------|
| Spine                       | Craniospinal<br>Total spine<br>Spine, thoracic region<br>Spine, lumbar region<br>Spine, sacral region<br>Spine, not otherwise specified                                                                                          |
| Thorax                      | Thorax<br>Mantle field<br>Mantle field without mediastinal<br>Scapula left<br>Scapula right<br>Scapula both sides<br>Scapula, side unknown<br>Ribs, sternum, clavicle<br>Mediastinal<br>Parasternal<br>Axilla<br>Supraclavicular |
| Abdominopelvic              | Abdominal<br>Liver<br>Spleen<br>Paraaortic field<br>Paraaortic field plus spleen<br>Inverted-Y field<br>Inverted-Y field plus spleen<br>Pelvis (including iliacal field)<br>Parailliacal field<br>Inguinal field                 |

**Definitions of ECG abnormalities according to the Minnesota Code**

| <b>Major Abnormalities</b>                                  | <b>Minnesota Codes</b>                   |
|-------------------------------------------------------------|------------------------------------------|
| Major Q wave abnormalities                                  | MC 1-1, 1-2                              |
| Minor Q wave abnormalities plus ST-T abnormalities          | MC I-3 plus MC 4-1 or 4-2, or 5-1 or 5-2 |
| Major Isolated ST-T abnormalities                           | MC 4-1 or 4-2 or 5-1 or 5-2              |
| Complete or intermittent LBBB                               | MC 7-1                                   |
| Complete or intermittent RBBB                               | MC 7-2                                   |
| Nonspecific intraventricular block                          | MC 7-4                                   |
| RBBB with left anterior hemiblock                           | MC 7.8                                   |
| Brugada pattern                                             | MC7-9                                    |
| Left ventricular hypertrophy plus ST-T abnormalities        | MC 3-1 plus MC 4-1 or 4-2 or 5-1 or 5-2  |
| Major QT prolongation                                       | QTI $\geq$ 116%                          |
| Atrial Fibrillation or Flutter (Continuous or intermittent) | MC 8-3                                   |
| Third-degree AV block                                       | MC 6-1                                   |
| Second-degree AV block                                      | MC 6-2                                   |
| Ventricular preexcitation pattern                           | MC 6-4                                   |
| Artificial pacemaker                                        | MC 6-8                                   |
| Ventricular fibrillation or ventricular asystole            | MC 8-2                                   |
| Supraventricular tachycardia (SVT)                          | MC 8-4-2 or MC 8-4-1 with HR > 140       |

| <b>Minor Abnormalities</b>         | <b>Minnesota Codes</b> |
|------------------------------------|------------------------|
| Minor Isolated Q/QS waves          | MC 1-3                 |
| Minor ST/T abnormalities           | MC 4-3, 4-4, 5-3, 5-4  |
| High R waves (left ventricular)    | MC 3-1, 3-3, 3-4       |
| High R waves (right ventricular)   | MC 3-2                 |
| ST segment elevation               | MC 9-2                 |
| Incomplete RBBB                    | MC 7-3                 |
| Incomplete LBBB                    | MC 7-6, 7-7            |
| Minor QT prolongation              | QTI $\geq$ 112%        |
| Short PR interval                  | MC 6-5                 |
| Long PR interval                   | MC 6-3                 |
| Left axis deviation                | MC 2-1                 |
| Right axis deviation               | MC 2-2                 |
| Premature beats (supraventricular) | MC 8-1-1               |
| Premature beats (ventricular)      | MC 8-1-2               |
| Premature beats (combined)         | MC 8-1-3, 8-1-5        |
| Wandering atrial pacemaker         | MC 8-1-4               |
| Sinus tachycardia                  | MC 8-7                 |
| Sinus bradycardia                  | MC 8-8                 |
| Supraventricular rhythm persistent | MC 8-4-1               |
| Low QRS voltage                    | MC 9-1                 |
| High amplitude P wave              | MC 9-3                 |
| Left atrial enlargement            | MC 9-6                 |

Prineas RJ, Crow RS, Zhang Z: The Minnesota code manual of electrocardiographic findings, 2009

## B. Characteristics of the participating and non-participating survivors from the DCCSS LATER 2 CARD study

|                                 | Participant<br>n=1,608 | Non-participants <sup>a</sup><br>n=1,383 |
|---------------------------------|------------------------|------------------------------------------|
| Sex (%)                         |                        |                                          |
| Female                          | 48                     | 39                                       |
| Year of diagnosis (%)           |                        |                                          |
| <1970                           | 1                      | 1                                        |
| 1970-1979                       | 12                     | 11                                       |
| 1980-1989                       | 30                     | 30                                       |
| 1990-1999                       | 45                     | 48                                       |
| ≥2000                           | 12                     | 10                                       |
| Age at diagnosis (%)            |                        |                                          |
| <5 years                        | 43                     | 42                                       |
| 5-9 years                       | 29                     | 28                                       |
| 10-14 years                     | 22                     | 23                                       |
| 15-17 years                     | 6                      | 7                                        |
| Age at invitation (%)           |                        |                                          |
| <18 years                       | 2                      | 1 <sup>b</sup>                           |
| 18-29 years                     | 33                     | 33 <sup>b</sup>                          |
| 30-39 years                     | 37                     | 40 <sup>b</sup>                          |
| ≥40 years                       | 29                     | 26 <sup>b</sup>                          |
| Time since cancer diagnosis (%) |                        |                                          |
| 10-19 years                     | 22                     | 21                                       |
| 20-29 years                     | 41                     | 44                                       |
| 30-39 years                     | 29                     | 28                                       |
| 40-49 years                     | 8                      | 7                                        |
| 50-59 years                     | 1                      | 0                                        |
| Type of cancer diagnosis (%)    |                        |                                          |
| Leukemia                        | 42                     | 43                                       |
| Lymphoma                        | 23                     | 25                                       |
| CNS                             | 3                      | 5                                        |
| Neuroblastoma                   | 3                      | 3                                        |
| Renal tumors                    | 12                     | 9                                        |
| Hepatic tumors                  | 1                      | 2                                        |
| Bone tumors                     | 8                      | 8                                        |
| Soft tissue sarcomas            | 5                      | 5                                        |
| Germ cell tumors                | 2                      | 2                                        |

<sup>a</sup> Includes the refusers (someone who actively said no) and the non-responders (someone who did not respond to the study invitation and thus did not actively say no).

<sup>b</sup> age at invitation was not available for refusers.

## C. Comparison of the prevalence of the separate major, minor and other ECG abnormalities between survivors (all and per cardiotoxic cancer exposure) and siblings

|                                                             | Siblings               |                               | Survivors                       |                                     |                             |                                                |
|-------------------------------------------------------------|------------------------|-------------------------------|---------------------------------|-------------------------------------|-----------------------------|------------------------------------------------|
|                                                             | n=272<br>n/N (%)       | All                           | Potentially cardiotoxic therapy | Only anthracyclines or mitoxantrone | Only heart RT               | Both anthracyclines/ mitoxantrone and heart RT |
|                                                             |                        | n=1,381*<br>n/N (%)           | n=155<br>n/N (%)                | n=809<br>n/N (%)                    | n=158<br>n/N (%)            | n=255<br>n/N (%)                               |
| <b>Presence of any major abnormality</b>                    | 34/251 (14)            | 199/1,249 (16)                | 17/138 (12)                     | 105/732 (14)                        | 34/142 (24) <sup>a,b</sup>  | 42/233 (18)                                    |
| Major Q wave abnormality                                    | 11/254 (4)             | 76/1,264 (6)                  | 7/143 (5)                       | 37/740 (5)                          | 17/145 (12) <sup>a</sup>    | 15/232 (7)                                     |
| Major isolated ST-T abnormality                             | 16/258 (6)             | 70/1,277 (6)                  | 4/145 (3)                       | 43/745 (6)                          | 11/146 (8)                  | 11/237 (5)                                     |
| Minor Q wave abnormalities <i>plus</i> ST-T abnormality     | 2/230 <sup>1</sup> (1) | 7/1,184 <sup>1</sup> (1)      | 1/136 <sup>1</sup> (0.7)        | 4/695 <sup>1</sup> (0.6)            | 1/133 <sup>1</sup> (0.8)    | 1/217 <sup>1</sup> (0.5)                       |
| Left ventricular hypertrophy <i>plus</i> ST-T abnormalities | 3/262 (1)              | 11/1,297 (1)                  | 1/146 (0.7)                     | 6/764 (0.8)                         | 1/148 (0.7)                 | 3/235 (1)                                      |
| Major QT prolongation                                       | 2/265 (1)              | 6/1,339 (0.5)                 | 2/147 (1)                       | 1/787 (0.1)                         | 2/153 (1)                   | 1/248 (0.4)                                    |
| Complete left bundle branch block                           | 0/264 (0)              | 21/1,314 (2) <sup>a</sup>     | 2/145 (1)                       | 9/774 (1)                           | 2/149 (1)                   | 8/242 (3) <sup>a</sup>                         |
| Complete right bundle branch block                          | 2/263 (1)              | 9/1,309 (1)                   | 1/144 (0.7)                     | 5/770 (0.6)                         | 0/149 (0)                   | 3/242 (1)                                      |
| Other intraventricular block                                | 2/262 (1)              | 15/1,309 (1)                  | 2/144 (1)                       | 7/770 (0.9)                         | 2/149 (1)                   | 4/242 (2)                                      |
| Bifascicular block                                          | 0/263 (0)              | 2/1,310 (0.2)                 | 1/144 (0.7)                     | 1/770 (0.1)                         | 0/149 (0)                   | 0/242 (0)                                      |
| WPW pattern                                                 | 0/272 (0)              | 2/1,381 (0.1)                 | 0/155 (0)                       | 0/809 (0)                           | 1/158 (0.6)                 | 1/255 (0.4)                                    |
| Pacemaker                                                   | 0/272 (0)              | 7/1,381 (1)                   | 0/155 (0)                       | 5/809 (0.6)                         | 0/158 (0)                   | 2/255 (0.8)                                    |
| <b>Presence of any minor abnormality</b>                    | 131/263 (50)           | 750/1,320 (57) <sup>a</sup>   | 87/150 (58)                     | 413/769 (54)                        | 102/153 (67) <sup>a,b</sup> | 145/242 (60) <sup>a</sup>                      |
| Minor Q-wave abnormality                                    | 12/251 (5)             | 91/1,262 (7)                  | 11/142 (8)                      | 54/742 (7)                          | 12/144 (8)                  | 14/229 (6)                                     |
| Minor ST-T abnormality                                      | 14/256 (6)             | 131/1,283 (10) <sup>a</sup>   | 12/146 (8)                      | 63/746 (8) <sup>b</sup>             | 20/150 (13) <sup>a</sup>    | 35/236 (15) <sup>a,b</sup>                     |
| High amplitude R waves right                                | 3/260 (1)              | 6/1,324 (0.5)                 | 1/153 (1)                       | 2/771 (0.3)                         | 3/152 (2)                   | 0/242 (0)                                      |
| High amplitude R waves left                                 | 19/254 (8)             | 170/1,279 (13) <sup>a,b</sup> | 12/145 (8)                      | 91/747 (11) <sup>a</sup>            | 28/148 (19) <sup>a,b</sup>  | 39/234 (17) <sup>a,b</sup>                     |
| Left atrial dilatation                                      | 15/272 (6)             | 194/1,379 (11) <sup>a,b</sup> | 20/154 (13) <sup>a,b</sup>      | 96/809 (12) <sup>a,b</sup>          | 36/158 (23) <sup>a,b</sup>  | 40/252 (16) <sup>a,b</sup>                     |
| ST segment elevation                                        | 13/256 (5)             | 79/1,282 (6)                  | 8/145 (6)                       | 41/752 (6)                          | 13/147 (9)                  | 17/232 (7)                                     |
| Incomplete right bundle branch block                        | 21/260 (8)             | 109/1,298 (8)                 | 8/144 (6)                       | 63/763 (8)                          | 15/148 (10)                 | 23/238 (10)                                    |
| Incomplete left bundle branch block                         | 4/258 (2)              | 9/1,293 (1)                   | 1/144 (1)                       | 4/763 (1)                           | 1/147 (1)                   | 3/235 (1)                                      |
| Minor QT prolongation                                       | 3/268 (1)              | 23/1,360 (2)                  | 4/150 (3)                       | 7/799 (1)                           | 3/156 (2)                   | 9/249 (4) <sup>b</sup>                         |
| Short PR interval                                           | 13/272 (5)             | 83/1,1381 (6)                 | 8/155 (5)                       | 49/809 (6)                          | 10/158 (6)                  | 15/253 (6)                                     |
| Long PR interval                                            | 2/272 (1)              | 9/1,380 (1)                   | 1/154 (1)                       | 5/809 (1)                           | 2/158 (1)                   | 1/253 (0.4)                                    |
| Left heart axis                                             | 6/265 (2)              | 39/1,326 (3)                  | 2/146 (1)                       | 25/781 (3)                          | 3/150 (2)                   | 9/244 (4)                                      |
| Right heart axis                                            | 14/265 (5)             | 54/1,326 (4)                  | 14/146 (10)                     | 22/781 (3) <sup>b</sup>             | 8/150 (5)                   | 10/244 (4)                                     |
| Atrial or junctional premature beats                        | 7/271 (3)              | 21/1,278 (2)                  | 3/154 (2)                       | 13/807 (2)                          | 2/158 (1)                   | 3/253 (1)                                      |

|                                    |               |                              |                              |                              |                            |                              |
|------------------------------------|---------------|------------------------------|------------------------------|------------------------------|----------------------------|------------------------------|
| Ventricular premature beats        | 2/271 (1)     | 4/1,379 (0.3)                | 0/155 (0)                    | 2/807 (0.2)                  | 0/158 (0)                  | 2/253 (0)                    |
| Sinus tachycardia                  | 1/272 (0.4)   | 20/1,381 (1)                 | 1/155 (1)                    | 6/809 (1)                    | 4/158 (3)                  | 9/253 (4) <sup>a,b</sup>     |
| Sinus bradycardia                  | 30/272 (11)   | 69/1,381 (5) <sup>a,b</sup>  | 7/155 (5) <sup>b</sup>       | 57/809 (7) <sup>a,b</sup>    | 3/158 (2) <sup>a,b</sup>   | 2/253 (1) <sup>a,b</sup>     |
| Supraventricular rhythm persistent | 2/272 (1)     | 8/1,381 (1)                  | 0/155 (0)                    | 7/809 (1)                    | 1/158 (1)                  | 0/253 (0)                    |
| Low QRS amplitude                  | 2/251 (1)     | 4/1,258 (0.3)                | 0/143 (0)                    | 4/739 (1)                    | 0/144 (0)                  | 0/228 (0)                    |
| <u>Other ECG patterns</u>          |               |                              |                              |                              |                            |                              |
| Cornell's Criteria                 | 2/272 (0.7)   | 63/1,379 (5) <sup>a</sup>    | 3/155 (2)                    | 32/808 (4) <sup>a</sup>      | 10/158 (6) <sup>a</sup>    | 18/254 (7) <sup>a</sup>      |
| Beats per minute; median, IQR      | 60 (55-67)    | 65 (58-74) <sup>a,b</sup>    | 61 (56-69) <sup>b</sup>      | 63 (56-71) <sup>a,b</sup>    | 71 (62-81) <sup>b</sup>    | 70 (61-79) <sup>a,b</sup>    |
| QRS duration (ms); median, IQR     | 92 (88-100)   | 92 (84-100) <sup>a,b</sup>   | 92 (88-100)                  | 92 (84-100) <sup>b</sup>     | 92 (82-100) <sup>b</sup>   | 88 (80-100) <sup>a,b</sup>   |
| QTc duration (ms); median, IQR     |               |                              |                              |                              |                            |                              |
| Male                               | 370 (355-389) | 381 (362-398) <sup>a,b</sup> | 379 (367-399) <sup>a,b</sup> | 380 (362-397) <sup>a,b</sup> | 383 (361-398) <sup>a</sup> | 382 (361-405) <sup>a,b</sup> |
| Female                             | 391 (376-408) | 394 (377-412) <sup>b</sup>   | 393 (378-415) <sup>b</sup>   | 393 (376-410) <sup>d</sup>   | 397 (377-413)              | 398 (382-417) <sup>a,b</sup> |

Abnormalities are not mutually exclusive; participants may have had more than 1 abnormality.

Prevalence was 0 in all treatment groups: Brugada pattern, atrial fibrillation, atrioventricular conduction defect, ventricular fibrillation or asystole and supraventricular tachycardia (missing in ~2%).

<sup>1</sup> missing in >10%.

\*in 4 survivors the cardiotoxic cancer treatment was unclear due to missing information on heart RT.

<sup>a</sup> unadjusted comparison with siblings demonstrated a p-value <0.05.

<sup>b</sup> after adjustment for sex and age at ECG, being a survivor (versus sibling) is significantly associated with the outcome.

ECG=electrocardiographic, IQR=interquartile range, n=number of participants with the events, N=total number of participants evaluated, RT=radiotherapy, WPW= Wolff-Parkinson-White

**Table 1. Comparison of the prevalence of the separate major and minor ECG abnormalities between survivors****D. Association between ECG and systolic function – additional results**

Full list of variables included in the LASSO models:

- Code 1.1
- Code 1.2
- Code 1.3
- Code 2.1
- Code 2.2
- Code 3.1
- Code 3.2
- High R waves - left ventricular (Code 3.1, Code 3.3, Code 3.4)
- Code 4.1
- Code 4.2
- Code 4.3
- Code 4.4
- Code 5.2
- Code 5.3
- Code 5.4
- Code 6.3
- Code 6.5
- Code 7.1.1
- Code 7.2.1
- Code 7.3
- Code 7.4
- Incomplete left bundle branch block (Code 7.6, Code 7.7)
- Code 7.8
- Code 8.1.1
- Code 8.1.2
- Code 8.4.1
- Code 8.7
- Code 8.8
- Code 9.1
- Code 9.2
- Code 9.6
- Major QT prolongation ( $QTI \geq 116\%$ )
- Minor QT prolongation ( $QTI \geq 112\%$ )
- Cornell's criteria
- Frequency (continuous variable)
- QTd interval (continuous variable)
- QRS interval (continuous variable)
- QTc interval (continuous variable)
- PQ interval (continuous variable)



**with a normal LVEF and an abnormal LVEF**

| n/N (%)                                                     | Normal LVEF*  | Abnormal LVEF             |                              |
|-------------------------------------------------------------|---------------|---------------------------|------------------------------|
|                                                             |               | ≥45%                      | <45%                         |
| Presence of any major abnormality                           | 85/643 (13)   | 30/174 (17)               | 11/28 (39) <sup>a,b</sup>    |
| Major Q wave abnormality                                    | 36/648 (6)    | 10/117 (6)                | 4/28 (14)                    |
| Major isolated ST-T abnormality                             | 36/655 (6)    | 12/177 (7)                | 2/ (7)                       |
| Minor Q wave abnormalities <i>plus</i> ST-T abnormality     | 3/611 (1)     | 1/163 (1)                 | 0/24 (0)                     |
| Left ventricular hypertrophy <i>plus</i> ST-T abnormalities | 5/667 (1)     | 1/180 (1)                 | 1/27 (4)                     |
| Major QT prolongation                                       | 3/695 (0.4)   | 0/184 (0)                 | 0/28 (0)                     |
| Complete left bundle branch block                           | 3/681 (0.4)   | 3/181 (2)                 | 4/27 (15) <sup>a,b</sup>     |
| Complete right bundle branch block                          | 3/679 (0.4)   | 3/181 (7)                 | 0/27 (0)                     |
| Other intraventricular block                                | 7/679 (1)     | 1/181 (1)                 | 2/27 (7) <sup>a,b</sup>      |
| Bifascicular block                                          | 1/679 (0.1)   | 0/181 (0)                 | 0/27 (0)                     |
| Presence of any minor abnormality                           | 369/681 (54)  | 114/184 (62) <sup>b</sup> | 20/27 (74) <sup>a</sup>      |
| Minor Q-wave abnormality                                    | 49/653 (8)    | 17/177 (10)               | 4/27 (15)                    |
| Minor Isolated Q wave abnormality                           | 41/648 (6)    | 16/177 (9)                | 4/27 (15)                    |
| Minor ST-T abnormality                                      | 58/658 (9)    | 22/179 (12)               | 7/27 (26) <sup>a,b</sup>     |
| High amplitude R waves right                                | 3/680 (0.4)   | 2/181 (1)                 | 0/28 (0)                     |
| High amplitude R waves left                                 | 93/657 (14)   | 28/179 (16)               | 5/27 (19)                    |
| Left atrial dilatation                                      | 82/717 (11)   | 32/188 (17) <sup>a</sup>  | 11/28 (39) <sup>a,b</sup>    |
| ST segment elevation                                        | 43/658 (7)    | 12/178 (7)                | 0/27 (0)                     |
| Incomplete right bundle branch block                        | 59/671 (9)    | 20/181 (11)               | 1/27 (4)                     |
| Incomplete left bundle branch block                         | 3/668 (0.4)   | 1/179 (1)                 | 0/27 (0)                     |
| Minor QT prolongation                                       | 10/707 (1)    | 4/186 (2)                 | 1/28 (4)                     |
| Short PR interval                                           | 40/718 (6)    | 17/188 (9)                | 1/28 (4)                     |
| Long PR interval                                            | 6/718 (1)     | 0/188 (0)                 | 0/28 (0)                     |
| Left heart axis                                             | 15/691 (2)    | 7/183 (4)                 | 4/27 (15) <sup>a,b</sup>     |
| Right heart axis                                            | 19/691 (3)    | 11/183 (6) <sup>a,b</sup> | 0/27 (0)                     |
| Atrial or junctional premature beats                        | 13/718 (2)    | 2/188 (1)                 | 0/28 (0)                     |
| Ventricular premature beats                                 | 1/718 (0.1)   | 0/188 (0)                 | 0/28 (0)                     |
| Sinus tachycardia                                           | 7/718 (1)     | 4/188 (2)                 | 2/28 (7) <sup>a,b</sup>      |
| Sinus bradycardia                                           | 44/718 (6)    | 5/188 (3)                 | 0/28 (0)                     |
| Supraventricular rhythm persistent                          | 4/718 (1)     | 1/188 (1)                 | 1/28 (4)                     |
| Low QRS amplitude                                           | 1/646 (0.2)   | 1/176 (1)                 | 0/27 (0)                     |
| Other ECG measures                                          |               |                           |                              |
| Cornell's criteria                                          | 10/718 (1)    | 4/188 (2)                 | 5/28 (18) <sup>a,b</sup>     |
| Heart rate; median, IQR                                     | 63 (57-72)    | 69 (60-80) <sup>a,b</sup> | 73 (61-83) <sup>a,b</sup>    |
| QRS duration (ms); median, IQR                              | 92 (84-100)   | 88 (84-100)               | 100 (89-123) <sup>a,b</sup>  |
| QRS duration >100 ms                                        | 106/718 (15)  | 31/81 (17)                | 13/28 (46) <sup>a,b</sup>    |
| QTc duration (ms); median, IQR                              |               |                           |                              |
| Male                                                        | 379 (361-397) | 377 (358-402)             | 388 (382-441) <sup>a,b</sup> |
| Female                                                      | 390 (374-409) | 396 (380-415)             | 412 (400-438) <sup>a,b</sup> |

\* LVEF≥54% in female, LVEF≥52% in male

<sup>a</sup> Fisher's exact test demonstrated a p-value <0.05<sup>b</sup> comparison with normal LVEF, adjusted for sex and age at ECG, demonstrated a p-value <0.05

ECG=electrocardiographic, IQR=interquartile range, n=number of participants with the events, N=total number of participants evaluated, LVEF=left ventricular dysfunction, RT=radiotherapy

**Table 2. Characteristics of the analyzed survivors in the cardiomyopathy surveillance group**

| n=880                                                           |                  |
|-----------------------------------------------------------------|------------------|
| <b>Demographics, diagnosis and treatment history</b>            |                  |
| Sex, n (%)                                                      |                  |
| Female                                                          | 394 (45%)        |
| Age at diagnosis, years, median [IQR]                           | 6.3 [3.2-11.4]   |
| 0-<5                                                            | 361 (41)         |
| 5-<10                                                           | 253 (29)         |
| 10-<15                                                          | 209 (24)         |
| 15-18                                                           | 57 (6)           |
| Primary cancer diagnosis, n (%)                                 |                  |
| Leukemias                                                       | 351 (40)         |
| Lymphomas/reticuloendothelial                                   | 227 (26)         |
| CNS, intracranial and intraspinal neoplasms                     | 29 (3)           |
| Neuroblastoma and other peripheral nervous cell tumors          | 26 (3)           |
| Renal tumors                                                    | 107 (12)         |
| Hepatic tumors                                                  | 8 (1)            |
| Bone tumors                                                     | 72 (8)           |
| Soft tissue and other extrasosseous sarcomas                    | 49 (6)           |
| Germ cell tumors                                                | 9 (1)            |
| Others                                                          | 2 (0.2)          |
| Age at follow-up, years, median [IQR]                           | 34.3 [28.5-42.6] |
| 15-<25, n (%)                                                   | 111 (13)         |
| 25-<35                                                          | 352 (40)         |
| 35-<45                                                          | 274 (31)         |
| ≥45                                                             | 143 (16)         |
| Time since cancer diagnosis, years, median [IQR]                | 26.6 [21.7-33.3] |
| 10-<20, n (%)                                                   | 264 (19)         |
| 20-<30                                                          | 580 (42)         |
| 30-<40                                                          | 402 (29)         |
| ≥40                                                             | 135 (10)         |
| Cumulative anthracycline dose, mg/m <sup>2</sup> , median [IQR] | 180 [120-275]    |
| No anthracyclines, n (%)                                        | 126 (14)         |
| 1-100                                                           | 127 (14)         |
| 100.1-250                                                       | 424 (48)         |
| >250                                                            | 203 (23)         |
| Mitoxantrone dose, mg/m <sup>2</sup> , median [IQR]             | 40 [20-72]       |
| No mitoxantrone, n (%)                                          | 825 (94)         |
| 1-40                                                            | 35 (4)           |
| >40                                                             | 20 (2)           |
| RT including the heart region dose, Gy, median [IQR]            | 12 [3.5-20.3]    |
| No RT including the heart region, n (%)                         | 592 (67)         |
| 1-15                                                            | 186 (21)         |
| 15.1-30                                                         | 60 (7)           |
| >30                                                             | 42 (5)           |
| <b>Outpatient clinic data,</b>                                  |                  |
| LVEF<45% at evaluation, n (%)                                   | 27 (3)           |

IQR=interquartile range, LVEF= left ventricular ejection fraction, n=number, RT = radiotherapy, y=year.

**Table 3. Multivariable models predicting the presence of LVEF <52% in males/ <54% in females in the cardiomyopathy surveillance group (n total = 880<sup>a</sup>, n with the outcome = 203)**

| n=880                                                 | OR (95%CI)     | p-value | AIC value | AUC (95%CI)      | H-L test |
|-------------------------------------------------------|----------------|---------|-----------|------------------|----------|
| <b>Model 1</b>                                        |                |         | 924       | 0.66 (0.61-0.70) | 0.7      |
| Male sex (versus female)                              | 0.6 (0.4-0.8)  | 0.001   |           |                  |          |
| Age at cancer diagnosis, /5 years                     | 0.7 (0.6-0.8)  | 0.003   |           |                  |          |
| Age at follow-up, /10 years                           | 1.2 (0.9-1.4)  | 0.2     |           |                  |          |
| Cumulative anthracycline dose, /100 mg/m <sup>2</sup> | 1.3 (1.2-1.4)  | <0.001  |           |                  |          |
| Mitoxantrone dose, /10 mg/m <sup>2</sup>              | 1.0 (0.9-1.1)  | 0.9     |           |                  |          |
| Heart RT dose, /10 Gray                               | 1.3 (1.1-1.5)  | <0.001  |           |                  |          |
| <b>Model 2</b>                                        |                |         | 891       | 0.71 (0.67-0.75) | 0.09     |
| Male sex (versus female)                              | 0.5 (0.4-0.8)  | <0.001  |           |                  |          |
| Age at cancer diagnosis, /5 years                     | 0.8 (0.6-0.9)  | 0.01    |           |                  |          |
| Age at follow-up, /10 years                           | 1.0 (0.8-1.3)  | 0.7     |           |                  |          |
| Cumulative anthracycline dose, /100 mg/m <sup>2</sup> | 1.3 (1.2-1.5)  | <0.001  |           |                  |          |
| Mitoxantrone dose, /10 mg/m <sup>2</sup>              | 1.0 (0.9-1.1)  | 0.9     |           |                  |          |
| Heart RT dose, /10 Gray                               | 1.2 (1.01-1.4) | 0.03    |           |                  |          |
| Abnormal ECG (versus normal) <sup>b</sup>             | 3.0 (1.8-5.0)  | <0.001  |           |                  |          |
| Heart rate, per 10                                    | 1.4 (1.2-1.5)  | <0.001  |           |                  |          |

<sup>a</sup> We could not analyse n=148 survivors because data on the included variables and/or data on the outcome were missing.

<sup>b</sup> Abnormal ECG = presence of left bundle branch block, left heart axis, right heart axis or Cornell's criteria.

AIC=Akaike information criterion, CI=confidence interval, ECG=electrocardiography, LVEF = left ventricular ejection fraction, OR = odds ratio

**Table 4. Multivariable model including all the ECG variables selected by LASSO predicting the presence of LVEF <52% in males/<54% in females in the cardiomyopathy surveillance group (n total = 880<sup>a</sup>, n with the outcome = 203)**

| n=880                                | OR (95%CI) <sup>b</sup> | p-value |
|--------------------------------------|-------------------------|---------|
| Left bundle branch block (versus no) | 4.5 (1.1-22.1)          | 0.04    |
| Left atrial enlargement (versus no)  | 1.3 (0.8-2.1)           | 0.2     |
| Short PR interval                    | 1.6 (0.8-2.9)           | 0.2     |
| Left heart axis (versus no)          | 2.6 (1.01-6.2)          | 0.04    |
| Right heart axis (versus no)         | 2.3 (0.97-5.0)          | 0.05    |
| Cornell's criteria (versus no)       | 3.2 (1.1-9.1)           | 0.03    |
| Heart rate, per 10                   | 1.3 (1.2-1.5)           | <0.001  |
| QTd time, per 10 ms                  | 1.04 (0.97-1.1)         | 0.2     |

<sup>a</sup> We could not analyse n=148 survivors because data on the included variables and/or data on the outcome were missing.

<sup>b</sup> Adjusted for sex, age at diagnosis, age at ECG and dose of anthracycline, mitoxantrone and heart RT.

ECG=electrocardiographic, CI=confidence interval, LVEF=left ventricular dysfunction, OR= odds ratio, RT=radiotherapy

**Table 5. Multivariable models predicting the presence of LVEF<50% in the cardiomyopathy surveillance group (n total = 880<sup>a</sup>, n with the outcome = 94)**

| n=880                                                 | OR (95%CI)       | p-value | AIC value | AUC (95%CI)      | H-L test |
|-------------------------------------------------------|------------------|---------|-----------|------------------|----------|
| <b>Model 1</b>                                        |                  |         | 581       | 0.66 (0.60-0.72) | 0.4      |
| Male sex (versus female)                              | 1.2 (0.001-0.07) | 0.4     |           |                  |          |
| Age at cancer diagnosis, /5 years                     | 0.7 (0.5-0.95)   | 0.02    |           |                  |          |
| Age at follow-up, /10 years                           | 1.3 (0.98-1.8)   | 0.07    |           |                  |          |
| Cumulative anthracycline dose, /100 mg/m <sup>2</sup> | 1.4 (1.2-1.7)    | <0.001  |           |                  |          |
| Mitoxantrone dose, /10 mg/m <sup>2</sup>              | 1.1 (0.9-1.2)    | 0.5     |           |                  |          |
| Heart RT dose, /10 Gray                               | 1.3 (1.1-1.6)    | 0.005   |           |                  |          |
| <b>Model 2</b>                                        |                  |         | 539       | 0.76 (0.70-0.81) | 0.2      |
| Male sex (versus female)                              | 1.2 (0.7-1.8)    | 0.5     |           |                  |          |
| Age at cancer diagnosis, /5 years                     | 0.8 (0.6-1.02)   | 0.07    |           |                  |          |
| Age at follow-up, /10 years                           | 1.1 (0.8-1.5)    | 0.6     |           |                  |          |
| Cumulative anthracycline dose, /100 mg/m <sup>2</sup> | 1.4 (1.2-1.6)    | <0.001  |           |                  |          |
| Mitoxantrone dose, /10 mg/m <sup>2</sup>              | 1.1 (0.9-1.2)    | 0.5     |           |                  |          |
| Heart RT dose, /10 Gray                               | 1.2 (0.97-1.5)   | 0.08    |           |                  |          |
| Abnormal ECG (versus normal) <sup>b</sup>             | 3.8 (2.4-6.1)    | <0.001  |           |                  |          |
| Heart rate, per 10                                    | 1.4 (1.2-1.6)    | <0.001  |           |                  |          |

<sup>a</sup> We could not analyse n=148 survivors because data on the included variables and/or data on the outcome were missing.

<sup>b</sup> Abnormal ECG = presence of left atrial enlargement, left heart axis, right heart axis, supraventricular rhythm or Cornell's criteria. AIC=Akaike information criterion, CI=confidence interval, ECG=electrocardiography, LVEF = left ventricular ejection fraction, OR = odds ratio

**Table 6. Multivariable model including all the ECG variables selected by LASSO predicting the presence of LVEF <50% in the cardiomyopathy surveillance group (n total = 880<sup>a</sup>, n with the outcome =94 )**

| n=880                                        | OR (95%CI) <sup>b</sup> | p-value |
|----------------------------------------------|-------------------------|---------|
| Left bundle branch block (versus no)         | 2.9 (0.6-14.6)          | 0.2     |
| Left atrial enlargement (versus no)          | 2.4 (1.3-4.2)           | 0.003   |
| Left heart axis (versus no)                  | 4.2 (1.4-11.3)          | 0.007   |
| Right heart axis (versus no)                 | 4.1 (1.5-10.2)          | 0.003   |
| Q-waves Code 1.2                             | 1.7 (0.7-4.0)           | 0.3     |
| Sinus tachycardia                            | 1.7 (0.4-7.4)           | 0.5     |
| Supraventricular rhythm persistent CODE8.4.1 | 8.4 (1.1-48.7)          | 0.02    |
| Cornell's criteria (versus no)               | 3.5 (1.1-10.8)          | 0.03    |
| Heart rate, per 10                           | 1.4 (1.1-1.7)           | 0.002   |
| QRS max                                      | 1.2 (0.97-1.4)          | 0.1     |

<sup>a</sup> We could not analyse n=148 survivors because data on the included variables and/or data on the outcome were missing.

<sup>b</sup> Adjusted for sex, age at diagnosis, age at ECG and dose of anthracycline, mitoxantrone and heart RT. ECG=electrocardiographic, CI=confidence interval, LVEF=left ventricular dysfunction, OR= odds ratio, RT=radiotherapy

**Table 7. Multivariable model including all the ECG variables selected by LASSO predicting the presence of LVEF<45% in the cardiomyopathy surveillance group (n total = 880<sup>a</sup>, n with the outcome = 27)**

| n=874                                          | OR (95% CI) <sup>b</sup> | p-value |
|------------------------------------------------|--------------------------|---------|
| Left bundle branch block (versus no)           | 11.1 (1.9-60.5)          | 0.01    |
| Left atrial enlargement (versus no)            | 3.0 (1.1-7.9)            | 0.03    |
| Left heart axis (versus no)                    | 5.1 (1.03-2.1)           | 0.03    |
| Supraventricular rhythm persistent (versus no) | 11.6 (0.4-125)           | 0.08    |
| Cornell's criteria (versus no)                 | 7.7 (1.7-33.5)           | 0.01    |
| Heart rate, per 10                             | 1.5 (1.01-2.1)           | 0.04    |
| QTc time, per 100 ms                           | 1.09 (0.9-1.3)           | 0.3     |

<sup>a</sup> We could not analyse n=148 survivors because data on the included variables and/or data on the outcome were missing.

<sup>b</sup> Adjusted for sex, age at diagnosis, age at ECG and dose of anthracycline, mitoxantrone and heart RT.

ECG=electrocardiographic, CI=confidence interval, LVEF=left ventricular dysfunction, OR= odds ratio, RT=radiotherapy

**Table 8. Diagnostic rule derived from model 2 Table 3.**

|                                                            |                                                         |
|------------------------------------------------------------|---------------------------------------------------------|
| <b>Sex</b>                                                 | <b>Points</b>                                           |
| Female                                                     | 0                                                       |
| Male                                                       | 8                                                       |
| <b>Age at cancer diagnosis (in years)</b>                  | <b>Points</b>                                           |
| 0                                                          | 20                                                      |
| 8                                                          | 11                                                      |
| 16                                                         | 2                                                       |
| 18                                                         | 0                                                       |
| <b>Age at ECG (in years)</b>                               | <b>Points</b>                                           |
| 15                                                         | 0                                                       |
| 30                                                         | 10                                                      |
| 60                                                         | 31                                                      |
| 70                                                         | 37                                                      |
| <b>Cumulative anthracycline dose (in mg/m<sup>2</sup>)</b> | <b>Points</b>                                           |
| 0                                                          | 0                                                       |
| 100                                                        | 8                                                       |
| 300                                                        | 24                                                      |
| 500                                                        | 40                                                      |
| 700                                                        | 55                                                      |
| 800                                                        | 63                                                      |
| <b>Mitoxantrone dose (in mg/m<sup>2</sup>)</b>             | <b>Points</b>                                           |
| 0                                                          | 0                                                       |
| 40                                                         | 25                                                      |
| 80                                                         | 50                                                      |
| 120                                                        | 75                                                      |
| 160                                                        | 100                                                     |
| <b>Heart RT (in Gray)</b>                                  | <b>Points</b>                                           |
| 0                                                          | 0                                                       |
| 15                                                         | 1                                                       |
| 40                                                         | 2                                                       |
| 60                                                         | 3                                                       |
| <b>ECG</b>                                                 |                                                         |
| Normal                                                     | 0                                                       |
| Abnormal                                                   | 36                                                      |
| <b>Heart rate</b>                                          |                                                         |
| 40                                                         | 0                                                       |
| 60                                                         | 16                                                      |
| 80                                                         | 31                                                      |
| 100                                                        | 47                                                      |
| 120                                                        | 63                                                      |
| 130                                                        | 71                                                      |
| <b>Total score</b>                                         |                                                         |
| <b>Total score</b>                                         | <b>Probability of LVEF&lt;45% estimated by the rule</b> |

|         |         |
|---------|---------|
| 0-69    | <1%     |
| 70-99   | 1-<5%   |
| 100-113 | 5-<10%  |
| 114-128 | 10-<20% |
| 129-153 | 20-<50% |

ECG=electrocardiography, LVEF=left ventricular dysfunction.

1. Stovall M, Weathers R, Kasper C, et al: Dose reconstruction for therapeutic and diagnostic radiation exposures: use in epidemiological studies. *Radiat Res* 166:141-57, 2006
2. Howell RM, Scarboro SB, Taddei PJ, et al: Methodology for determining doses to in-field, out-of-field and partially in-field organs for late effects studies in photon radiotherapy. *Phys Med Biol* 55:7009-23, 2010
3. Howell RM, Smith SA, Weathers RE, et al: Adaptations to a Generalized Radiation Dose Reconstruction Methodology for Use in Epidemiologic Studies: An Update from the MD Anderson Late Effect Group. *Radiat Res* 192:169-188, 2019
4. Badouna AN, Veres C, Haddy N, et al: Total heart volume as a function of clinical and anthropometric parameters in a population of external beam radiation therapy patients. *Phys Med Biol* 57:473-84, 2012
5. Veres C, Allodji RS, Llanas D, et al: Retrospective reconstructions of active bone marrow dose-volume histograms. *Int J Radiat Oncol Biol Phys* 90:1216-24, 2014
6. Isambert A, Beaudre A, Ferreira I, et al: [Quality assurance of a virtual simulation software: application to IMaGo and SIMaGo (ISOgray)]. *Cancer Radiother* 11:178-87, 2007
